# Supplementary material
Source: PubMed Central journal article supplement (PMC2343614)
Supplement: jphysiol_2003.053637_3.pdf [file jphysiol_2003.053637_3.pdf]

WT

GluR-A<sup>-/-</sup>

$\alpha$ -GluR-B

$\alpha$ -GluR-B
