# Supplementary material
Source: PubMed Central journal article supplement (PMC2343614)

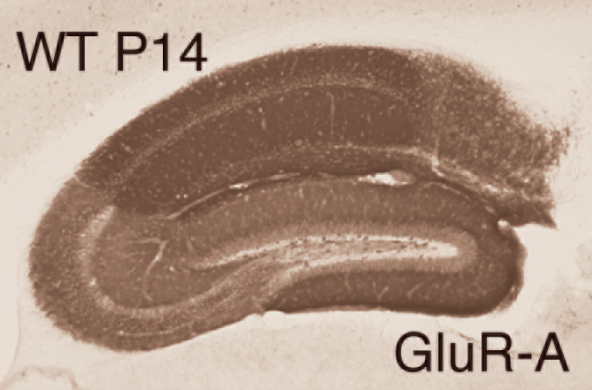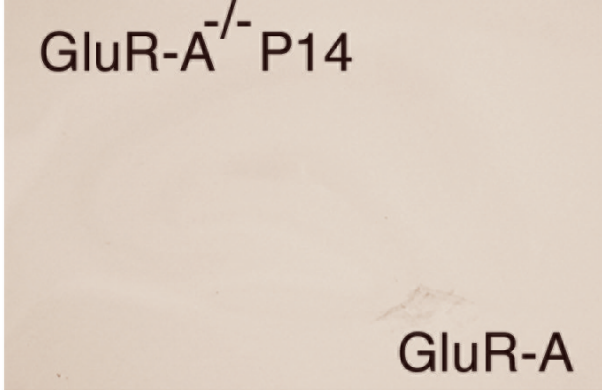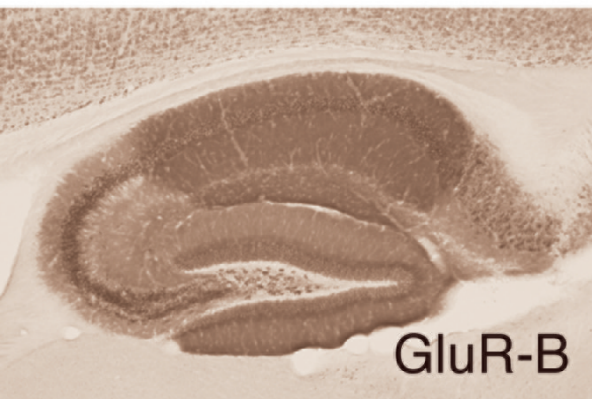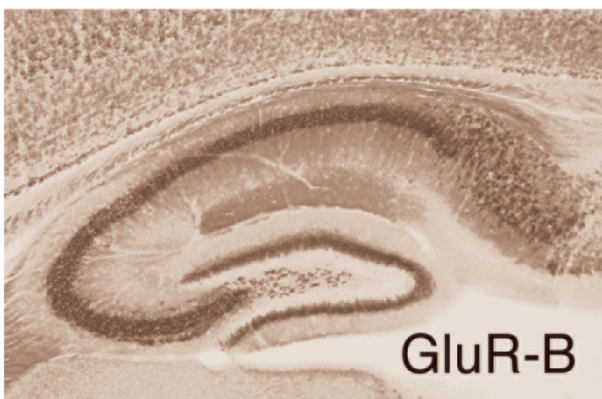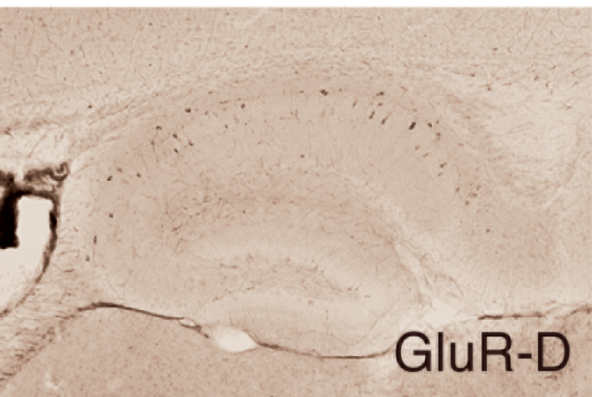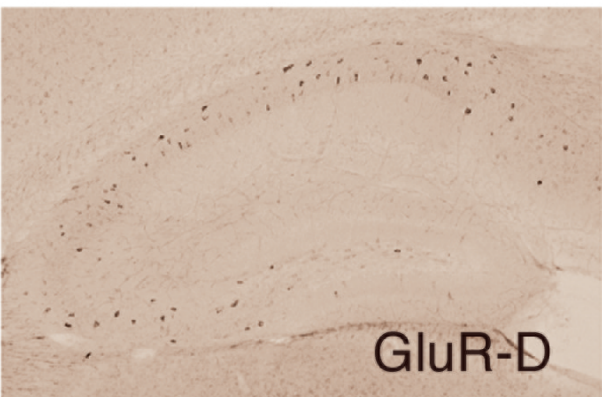

Supplement: jphysiol_2003.053637_1.pdf [file jphysiol_2003.053637_1.pdf]

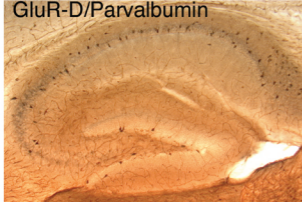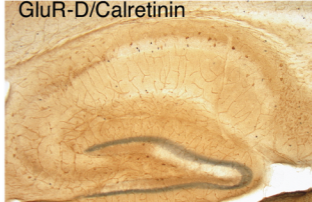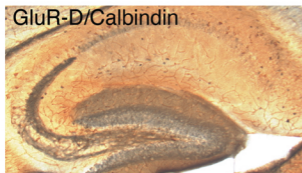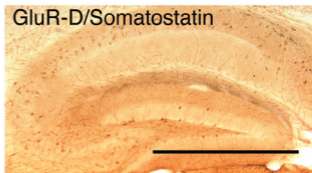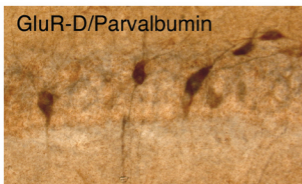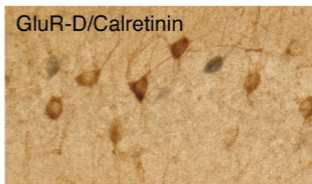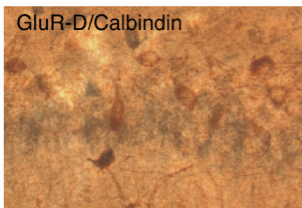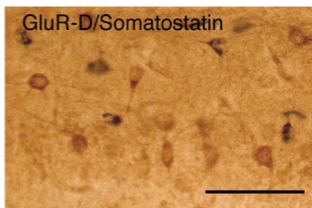

GluR-D=brown

others=blue

both=black

supplementary figure 2: Jensen *et al.*

Supplement: jphysiol_2003.053637_2.pdf [file jphysiol_2003.053637_2.pdf]
